# Supplementary material for: Gene Expression-Based Classification of Non-Small Cell Lung Carcinomas and Survival Prediction
Source: PLoS One. 2010 Apr 22;5(4):e10312. doi: 10.1371/journal.pone.0010312 (PMC2858668; doi:10.1371/journal.pone.0010312)
Supplement: Table S2 — NSCLC Tumor Signature (long) T∶N ratio Ratio of average expression in NSCLC samples/normal lung tissue T mean 2log transformation of mean expression value in NSCLC samples (average of all NSCLC and normal lung tissue = 0). N mean 2log transformation of mean expression value in normal lung tissue samples (average of all NSCLC and normal lung tissue = 0). T SD Standard deviation of mean expression value in NSCLC samples N SD Standard deviation of mean expression value in normal lung tissue samples. (0.05 MB XLS) [file pone.0010312.s003.xls]

## Sheet: Sheet1
Probe set	Gene Symbol	Gene Symbol before 2008	T:N Ratio	T Mean	N Mean	T SD	N SD	q value
213664_at	SLC1A1	SLC1A1	0.130861	-1.65221	1.91644	1.41356	0.570576	0.00556221
226625_at	TGFBR3	TGFBR3	0.176074	-1.07894	1.7018	0.975899	0.432636	0.00556221
227826_s_at	---	SORBS2	0.139548	-1.28156	1.89741	1.07074	0.623152	0.00556221
227874_at	EMCN		0.0979408	-1.57774	2.23712	1.16201	0.650919	0.00556221
228504_at	---		0.0998994	-1.76579	2.4469	1.5293	0.442969	0.00556221
229127_at	JAM2	ATP5J	0.155937	-1.21296	1.7147	0.82612	0.449647	0.00556221
229308_at	---		0.127913	-1.41872	2.1075	1.12609	0.552087	0.00556221
229339_at	---		0.320301	-0.665716	0.951105	0.327474	0.437474	0.00556221
229641_at	---		0.147554	-1.2506	1.76209	0.828165	0.351183	0.00556221
230711_at	---	EPAS1	0.188252	-0.858633	1.46335	0.553649	0.759538	0.00556221
233392_at	---		0.185539	-0.922636	1.42686	0.419112	0.708956	0.00556221
235108_at	---		0.180019	-0.961974	1.66105	0.825383	0.620522	0.00556221
235570_at	---		0.212498	-1.10403	1.45624	1.02554	0.295673	0.00556221
235670_at	STX11	STX11	0.156519	-1.30698	1.78687	1.02114	0.437662	0.00556221
235915_at	---		0.15316	-1.07426	1.35668	0.386479	1.04164	0.00556221
236065_at	---		0.129569	-1.40358	1.71683	0.883187	0.743925	0.00556221
236383_at	---		0.14941	-1.13004	1.59711	0.583322	0.772193	0.00556221
236936_at	---		0.126684	-1.3947	1.78996	0.810113	0.594994	0.00556221
238178_at	---		0.133647	-1.05805	1.88512	0.681733	0.832097	0.00556221
239262_at	---	PRSS23	0.152689	-1.14846	1.6705	0.641321	0.548065	0.00556221
239849_at	---		0.0958342	-1.21492	1.98864	0.586296	1.01578	0.00556221
242009_at	SLC6A4		0.0556382	-1.66153	2.96913	1.07119	1.51521	0.00556221
242500_at	---		0.168365	-0.991299	1.67445	0.708976	0.603271	0.00556221
242868_at	---	EPAS1	0.161228	-1.16264	1.75195	1.14449	0.618177	0.00556221
243172_at	---		0.179165	-0.942309	1.59761	0.57642	0.557	0.00556221
243813_at	---		0.147238	-1.05117	1.74732	0.585506	0.766595	0.00556221
243818_at	SFTA1P		0.143103	-1.35069	1.86317	0.928802	0.385686	0.00556221
204719_at	ABCA8	ABCA8	0.0866353	-1.82756	2.36089	1.32014	0.39198	0.00556221
223395_at	ABI3BP	ABI3BP	0.163304	-1.32757	1.76209	1.27345	0.303227	0.00556221
206069_s_at	ACADL	ACADL	0.108588	-1.34616	1.86591	0.641802	0.799574	0.00556221
220677_s_at	ADAMTS8	ADAMTS8	0.115931	-1.25938	1.94608	0.691313	0.667323	0.00556221
235649_at	ADAMTS8	ADAMTS8	0.0803107	-1.73071	2.44508	1.10769	0.584317	0.00556221
203865_s_at	ADARB1	ADARB1	0.151157	-1.25414	1.69771	0.861237	0.382302	0.00556221
209612_s_at	ADH1B	ADH1B	0.092203	-2.29142	2.69158	2.19954	0.550798	0.00556221
209613_s_at	ADH1B	ADH1B	0.0886806	-2.32045	2.80885	2.28674	0.458316	0.00556221
209614_at	ADH1B	ADH1B	0.112611	-1.49414	1.78422	0.748843	0.609705	0.00556221
229309_at	ADRB1	ADRB1	0.083864	-1.90195	2.65186	1.59332	0.715783	0.00556221
206170_at	ADRB2	ADRB2	0.161685	-1.33864	1.71862	1.16333	0.525235	0.00556221
210081_at	AGER	AGER	0.0620374	-2.06167	3.0542	1.38661	0.544292	0.00556221
217046_s_at	AGER	AGER	0.0998164	-1.41353	2.25281	0.861192	0.512259	0.00556221
202759_s_at	AKAP2 /// PALM2 /// PALM2-AKAP2	PALM2-AKAP2	0.200375	-1.13281	1.46486	0.97561	0.432897	0.00556221
226694_at	AKAP2 /// PALM2 /// PALM2-AKAP2	PALM2-AKAP2	0.244048	-0.953283	1.28644	0.856189	0.35755	0.00556221
224339_s_at	ANGPTL1	ANGPTL1	0.266769	-0.807078	0.958259	0.359411	0.734234	0.00556221
231773_at	ANGPTL1	ANGPTL1	0.230726	-0.927819	1.14928	0.519373	0.644333	0.00556221
218418_s_at	KANK2	ANKRD25	0.281242	-0.898029	1.0788	0.70565	0.300872	0.00556221
213715_s_at	KANK3	ANKRD47	0.208527	-0.860286	1.42939	0.595643	0.588939	0.00556221
222608_s_at	ANLN	ANLN	21.6077	1.54929	-2.34571	1.67166	0.541421	0.00556221
204894_s_at	AOC3	AOC3	0.151603	-1.37967	1.72758	1.13685	0.362146	0.00556221
206167_s_at	ARHGAP6	ARHGAP6	0.224511	-1.06547	1.72127	1.14041	0.430923	0.00556221
206030_at	ASPA	ASPA	0.213611	-0.96957	1.21458	0.425384	0.603392	0.00556221
219918_s_at	ASPM	ASPM	16.042	1.38669	-2.22367	1.51953	0.575408	0.00556221
203296_s_at	ATP1A2	ATP1A2	0.20062	-0.941867	1.39665	0.596477	0.665102	0.00556221
228434_at	BTNL9	BTNL9	0.114909	-1.33012	2.28562	1.22831	0.729447	0.00556221
203571_s_at	C10orf116	C10orf116	0.134717	-1.58007	1.84753	1.31803	0.472459	0.00556221
218723_s_at	C13orf15	C13orf15	0.166849	-1.2179	1.70936	0.971545	0.29744	0.00556221
235568_at	C19orf59	TRAPPC5	0.0981633	-1.85716	2.45024	1.43624	0.641613	0.00556221
239349_at	C1QTNF7	C1QTNF7	0.135058	-1.2352	1.82124	0.68452	0.742249	0.00556221
213900_at	C9orf61	C9orf61	0.145488	-1.25756	1.83046	0.931449	0.384355	0.00556221
206208_at	CA4	CA4	0.172921	-1.02907	1.68481	0.695976	0.522087	0.00556221
206209_s_at	CA4	CA4	0.0824468	-1.60495	2.63635	1.03451	0.549472	0.00556221
203065_s_at	CAV1	CAV1	0.151915	-1.36747	1.8468	1.21406	0.431471	0.00556221
212097_at	CAV1	CAV1	0.163759	-1.32915	1.70315	1.10715	0.241775	0.00556221
203323_at	CAV2	CAV2	0.144885	-1.44064	1.8814	1.31834	0.350973	0.00556221
214710_s_at	CCNB1	CCNB1	14.3077	1.33009	-2.17712	1.32287	0.478874	0.00556221
202705_at	CCNB2	CCNB2	14.019	1.3741	-2.01734	1.44803	0.468358	0.00556221
228766_at	CD36	CD36	0.114306	-1.77522	2.20556	1.45606	0.724429	0.00556221
202870_s_at	CDC20	CDC20	17.2991	1.49772	-2.15112	1.53113	0.451235	0.00556221
204677_at	CDH5	CDH5	0.162775	-1.18557	1.74778	0.979839	0.391396	0.00556221
214135_at	CLDN18	CLDN18	0.0739298	-2.02619	2.83382	1.75304	0.3523	0.00556221
232578_at	CLDN18	CLDN18	0.076848	-2.12329	2.85073	1.53339	0.838412	0.00556221
213317_at	CLIC5	CLIC5	0.0826382	-1.99211	2.76998	1.7871	0.420681	0.00556221
217628_at	CLIC5	CLIC5	0.206796	-0.926277	1.39419	0.59254	0.67426	0.00556221
219866_at	CLIC5 /// LOC100131610	CLIC5	0.115108	-1.51796	2.15091	1.17849	0.557303	0.00556221
211343_s_at	COL13A1	COL13A1	0.214857	-1.00544	1.38454	0.784215	0.435988	0.00556221
230867_at	COL6A6	COL6A6	0.117375	-1.58254	2.04175	1.31427	0.535337	0.00556221
227178_at	CUGBP2	CUGBP2	0.213595	-1.07046	1.36069	0.810814	0.293758	0.00556221
1555497_a_at	CYP4B1	CYP4B1	0.0929916	-1.69471	2.19861	1.25706	0.929937	0.00556221
210762_s_at	DLC1	DLC1	0.185822	-1.19669	1.64189	1.19032	0.481833	0.00556221
224822_at	DLC1	DLC1	0.156126	-1.32626	1.78595	1.19763	0.396705	0.00556221
203764_at	DLGAP5	DLG7	18.0888	1.40215	-2.27421	1.53437	0.361151	0.00556221
205003_at	DOCK4	DOCK4	0.265736	-0.928392	1.1911	0.902731	0.31634	0.00556221
219597_s_at	DUOX1	DUOX1	0.152723	-1.29194	1.739	1.07648	0.595257	0.00556221
204642_at	S1PR1	EDG1	0.19657	-1.00413	1.37273	0.640625	0.566558	0.00556221
204271_s_at	EDNRB	EDNRB	0.114812	-1.38798	2.01966	0.99818	0.628823	0.00556221
204273_at	EDNRB	EDNRB	0.077677	-1.80829	2.49323	1.26328	0.67887	0.00556221
206701_x_at	EDNRB	EDNRB	0.100995	-1.44614	2.13972	0.877431	0.658709	0.00556221
228967_at	EIF1	EIF1	0.267959	-0.737597	1.22503	0.616112	0.481685	0.00556221
219436_s_at	EMCN	EMCN	0.152162	-1.31043	1.73504	1.09706	0.690289	0.00556221
222885_at	EMCN	EMCN	0.169939	-1.19987	1.69722	1.1245	0.520254	0.00556221
203980_at	FABP4	FABP4	0.0915272	-2.10906	2.66002	1.72245	0.629836	0.00556221
207547_s_at	FAM107A	FAM107A	0.102911	-1.28172	2.07789	0.689417	0.691916	0.00556221
209074_s_at	FAM107A	FAM107A	0.0781414	-1.63704	2.66891	1.21072	0.711465	0.00556221
205866_at	FCN3	FCN3	0.0684443	-1.83429	2.76583	1.37715	0.897208	0.00556221
201540_at	FHL1	FHL1	0.1433	-1.4576	1.9444	1.21973	0.268441	0.00556221
210299_s_at	FHL1	FHL1	0.110865	-1.77377	2.28733	1.39865	0.509618	0.00556221
220170_at	FHL5	FHL5	0.161893	-1.14322	1.62753	0.806131	0.718634	0.00556221
206742_at	FIGF	FIGF	0.081448	-1.77426	2.4499	1.19893	0.666615	0.00556221
1556325_at	FILIP1	FILIP1	0.171191	-1.16808	1.72974	1.00035	0.606775	0.00556221
228268_at	FMO2	FMO2	0.124881	-1.45425	2.17168	1.32577	0.475617	0.00556221
205935_at	FOXF1	FOXF1	0.171307	-1.0905	1.62284	0.836379	0.586173	0.00556221
228568_at	GCOM1 /// GRINL1A	Gcom1	0.15475	-1.15719	1.72284	0.740883	0.599867	0.00556221
206159_at	GDF10	GDF10	0.117439	-1.25543	1.84163	0.50166	0.669706	0.00556221
206102_at	GINS1	GINS1	15.9444	1.47219	-2.10697	1.46146	0.460577	0.00556221
238222_at	GKN2	GKN2	0.0812513	-1.9206	2.58214	1.27557	0.574265	0.00556221
230360_at	GLDN	GLDN	0.109268	-1.37961	2.09318	0.992691	0.795556	0.00556221
209469_at	GPM6A	GPM6A	0.105442	-1.57899	2.40283	1.12066	0.47877	0.00556221
209470_s_at	GPM6A	GPM6A	0.0939144	-1.7494	2.62375	1.24548	0.575842	0.00556221
232267_at	GPR133	GPR133	0.201295	-1.25326	1.79069	1.38485	0.304812	0.00556221
204396_s_at	GRK5	GRK5	0.235262	-0.867912	1.44049	0.792622	0.34629	0.00556221
238018_at	FAM150B	hCG_1990170	0.0928697	-1.40175	1.90946	0.687742	0.963783	0.00556221
213069_at	HEG1	HEG1	0.278364	-0.882644	1.14576	0.784768	0.321705	0.00556221
203914_x_at	HPGD	HPGD	0.113944	-1.73394	2.17601	1.63765	0.620742	0.00556221
211548_s_at	HPGD	HPGD	0.106934	-1.81027	2.2595	1.56032	0.671918	0.00556221
205700_at	HSD17B6	HSD17B6	0.123942	-1.61856	1.97282	1.42357	0.587	0.00556221
37512_at	HSD17B6	HSD17B6	0.120293	-1.61819	2.07673	1.43404	0.606423	0.00556221
230670_at	IGSF10	IGSF10	0.180839	-1.1146	1.52636	0.829238	0.517573	0.00556221
224061_at	INMT	INMT	0.119458	-1.44103	2.0717	1.23558	0.682353	0.00556221
235666_at	---		0.136344	-1.41455	1.82629	1.05122	0.371003	0.00556221
219064_at	ITIH5	ITIH5	0.216665	-1.12177	1.3955	0.919756	0.376662	0.00556221
219213_at	JAM2	JAM2	0.227192	-0.985073	1.25383	0.702937	0.449407	0.00556221
202503_s_at	KIAA0101	KIAA0101	13.1999	1.34192	-2.1583	1.3056	0.753003	0.00556221
209408_at	KIF2C	KIF2C	9.03181	1.14623	-1.70156	1.20062	0.381014	0.00556221
206481_s_at	LDB2	LDB2	0.178532	-1.16374	1.63097	1.00828	0.485406	0.00556221
203766_s_at	LMOD1	LMOD1	0.223125	-0.940429	1.30676	0.710051	0.522197	0.00556221
220244_at	LOH3CR2A	LOH3CR2A	0.117608	-1.34875	1.98186	0.938522	0.691284	0.00556221
220003_at	LRRC36	LRRC36	0.186464	-1.02463	1.37831	0.463634	0.618002	0.00556221
203362_s_at	MAD2L1	MAD2L1	13.639	1.2817	-2.05095	1.37485	0.453656	0.00556221
228885_at	MAMDC2	MAMDC2	0.0737246	-1.90328	2.72225	1.38388	0.604232	0.00556221
212713_at	MFAP4	MFAP4	0.13374	-1.42556	1.85814	1.08029	0.674874	0.00556221
219909_at	MMP28	MMP28	0.23217	-1.03045	1.26025	0.753756	0.489043	0.00556221
239272_at	MMP28	MMP28	0.161679	-1.43116	1.56546	0.982276	0.493678	0.00556221
239273_s_at	MMP28	MMP28	0.260257	-1.04992	1.16761	0.919397	0.436434	0.00556221
219091_s_at	MMRN2	MMRN2	0.222026	-0.955614	1.35877	0.689171	0.379256	0.00556221
236262_at	MMRN2	MMRN2	0.191725	-1.01762	1.57283	0.841813	0.466934	0.00556221
227417_at	MOSC2	MOSC2	0.207822	-1.11155	1.3758	0.878192	0.35015	0.00556221
226856_at	MUSTN1	TMEM110	0.247158	-0.856976	1.19818	0.612059	0.653833	0.00556221
212372_at	MYH10	MYH10	0.293404	-0.766283	1.12709	0.698085	0.366098	0.00556221
237206_at	MYOCD	MYOCD	0.233061	-0.84559	1.21657	0.519181	0.626772	0.00556221
204641_at	NEK2	NEK2	13.6617	1.37727	-1.92479	1.37417	0.294734	0.00556221
223381_at	NUF2	NUF2	14.9292	1.42583	-1.93904	1.46968	0.302224	0.00556221
218736_s_at	PALMD	PALMD	0.1754	-1.21013	1.45589	0.827514	0.561128	0.00556221
227088_at	PDE5A	PDE5A	0.191958	-1.1466	1.42362	0.817858	0.46726	0.00556221
209493_at	PDZD2	PDZD2	0.129162	-1.69662	1.85355	1.2881	0.435774	0.00556221
208981_at	PECAM1	PECAM1	0.285487	-0.840258	1.14411	0.774544	0.303126	0.00556221
206311_s_at	PLA2G1B	PLA2G1B	0.125915	-1.46076	1.96256	1.03887	0.725271	0.00556221
227148_at	PLEKHH2	PLEKHH2	0.149412	-1.29964	1.72242	0.954658	0.470962	0.00556221
201578_at	PODXL	PODXL	0.293481	-0.80683	1.05186	0.648	0.40254	0.00556221
227006_at	PPP1R14A	PPP1R14A	0.171436	-1.12142	1.69751	0.99737	0.55319	0.00556221
226380_at	PTPN21	PTPN21	0.157265	-1.23372	1.73015	0.955525	0.520268	0.00556221
205846_at	PTPRB	PTPRB	0.168687	-1.13037	1.64812	0.851968	0.629693	0.00556221
230250_at	PTPRB	PTPRB	0.122257	-1.46017	2.10757	1.25379	0.588502	0.00556221
205326_at	RAMP3	RAMP3	0.153931	-1.08164	1.69993	0.71957	0.690065	0.00556221
210550_s_at	RASGRF1	RASGRF1	0.272226	-0.911704	1.02609	0.678786	0.590673	0.00556221
205407_at	RECK	RECK	0.235535	-1.00519	1.28908	0.877477	0.416548	0.00556221
243481_at	RHOJ	RHOJ	0.26743	-0.786654	1.12665	0.574688	0.610903	0.00556221
226028_at	ROBO4	ROBO4	0.146973	-1.12046	1.81455	0.794507	0.502503	0.00556221
235849_at	SCARA5	SCARA5	0.190955	-1.10306	1.18935	0.673374	0.856621	0.00556221
236359_at	SCN4B	SCN4B	0.176176	-0.9731	1.63627	0.762476	0.774054	0.00556221
222717_at	SDPR	SDPR	0.130384	-1.43937	2.20719	1.36147	0.507601	0.00556221
215454_x_at	SFTPC	SFTPC	0.0868447	-1.85145	2.37636	1.38556	0.513271	0.00556221
226673_at	SH2D3C	SH2D3C	0.260066	-0.796997	1.18427	0.598786	0.567386	0.00556221
218087_s_at	SORBS1	SORBS1	0.185046	-1.3139	1.78811	1.25987	0.423539	0.00556221
215918_s_at	SPTBN1	SPTBN1	0.162679	-1.07625	1.74516	0.740362	0.394765	0.00556221
227480_at	SUSD2	SUSD2	0.105847	-1.76799	2.32986	1.52269	0.400078	0.00556221
234310_s_at	SUSD2	SUSD2	0.223103	-0.955	1.29617	0.623257	0.513839	0.00556221
209447_at	SYNE1	SYNE1	0.263839	-0.943474	1.21658	0.915826	0.329733	0.00556221
200911_s_at	TACC1	TACC1	0.306432	-0.815228	1.04175	0.774506	0.209702	0.00556221
204931_at	TCF21	TCF21	0.0826568	-1.7566	2.21394	1.01402	0.597651	0.00556221
229529_at	TCF21	TCF21	0.17068	-1.08111	1.54123	0.684571	0.691754	0.00556221
206702_at	TEK	TEK	0.131399	-1.35347	1.96606	1.00018	0.477554	0.00556221
219230_at	TMEM100	TMEM100	0.0707502	-2.10639	2.84167	1.63696	0.937269	0.00556221
209904_at	TNNC1	TNNC1	0.120049	-1.45056	2.35249	1.2988	0.474652	0.00556221
221747_at	TNS1	TNS1	0.190123	-1.05324	1.52678	0.792484	0.377938	0.00556221
221748_s_at	TNS1	TNS1	0.219952	-0.981603	1.50747	0.973006	0.330318	0.00556221
206093_x_at	TNXA /// TNXB	TNXB	0.153287	-1.16948	1.63593	0.702953	0.487137	0.00556221
213451_x_at	TNXA /// TNXB	TNXB	0.140287	-1.18522	1.75524	0.704705	0.510667	0.00556221
216333_x_at	TNXA /// TNXB	TNXB	0.144183	-1.19279	1.6984	0.685562	0.490537	0.00556221
201291_s_at	TOP2A	TOP2A	32.1324	1.85724	-2.83938	1.64714	0.821458	0.00556221
201292_at	TOP2A	TOP2A	23.5966	1.57869	-2.46618	1.60296	0.410412	0.00556221
210052_s_at	TPX2	TPX2	17.0281	1.37638	-2.14933	1.52913	0.385439	0.00556221
202954_at	UBE2C	UBE2C	15.202	1.42444	-1.95752	1.45643	0.358914	0.00556221
223229_at	UBE2T	UBE2T	12.179	1.31394	-1.91495	1.20669	0.343553	0.00556221
232122_s_at	VEPH1	VEPH1	0.0962188	-1.7582	2.18704	1.19395	0.547995	0.00556221
220327_at	VGLL3	VGLL3	0.155991	-1.30192	1.74042	0.92308	0.468906	0.00556221
205019_s_at	VIPR1	VIPR1	0.134037	-1.07745	2.05195	1.00387	0.935983	0.00556221
222738_at	WWC2	WWC2	0.178034	-1.12374	1.52189	0.731034	0.5054	0.00556221
1555800_at	ZNF385B	ZNF533	0.123712	-1.69847	1.95428	1.35695	0.833345	0.00556221
