# Supplementary material for: Gene Expression-Based Classification of Non-Small Cell Lung Carcinomas and Survival Prediction
Source: PLoS One. 2010 Apr 22;5(4):e10312. doi: 10.1371/journal.pone.0010312 (PMC2858668; doi:10.1371/journal.pone.0010312)
Supplement: Table S9 — Comparison of EMC histology signatures with other NSCLC histology signatures. (0.02 MB XLS) [file pone.0010312.s010.xls]

## Sheet: Sheet1
Publication	Platform	Signature	Nr. of Signature Genes	Comparison Index	Overlap with EMC signature: #	Nr. of Probesets on Affymetrix U133Plus2	Performance with EMC cohort*		Performance with Duke cohort*
							ADC:SCC:LCC	ADC : nonADC	ADC:SCC
Erasmus MC	Affymetrix U133Plus2.0	Histology; Prognosis	58	-	-	75	1	-	0.84
Garber et al. (2001) PNAS	Stanford cDNA	Histology	~ 370	Gene Name; Gene Symbol	Tumor Signature: 5 (1); Histology Signature: 61 (12)	598	0.85	-	0.75
Kobayashi et al. (2004) Oncogene	IntelliGene Human cancer CHIP	Histology (ADC)	4	Gene Symbol	Tumor Signature: 1 (1)	11	0.56	0.71	0.71
US20040241725A1	Affymetrix; MetriGenix 4D LC	Histology	20	Gene Symbol; GenBank ID	Tumor Signature: 2; Histology Signature: 5 (3)	55	0.93	-	0.78
Bhattacharjee et al. (2001) PNAS / Guo et al. (2008) CCR	Affymetrix U95A	Histology (ADC)	175	Probe set ID	Tumor Signature: 12 (1); Histology Signature: 23 (2)	356	0.75	0.78	0.83
#: overlapped genes with the complete signatures
(#): overlapped genes with the optimized signatures
* : percentage of correct prediction
